# Supplementary material for: Influence of Membrane Equivalent Weight and Reinforcement on Ionic Species Crossover in All-Vanadium Redox Flow Batteries
Source: MDPI journal article supplement (doi:10.3390/membranes7020029), 2017-06-06
Supplement: s1 [file s1]

# Supplementary Materials: Influence of Membrane Equivalent Weight and Reinforcement on Ionic Species Crossover in All-Vanadium Redox Flow Batteries

Yasser Ashraf Gandomi, Doug S. Aaron and Matthew M. Mench

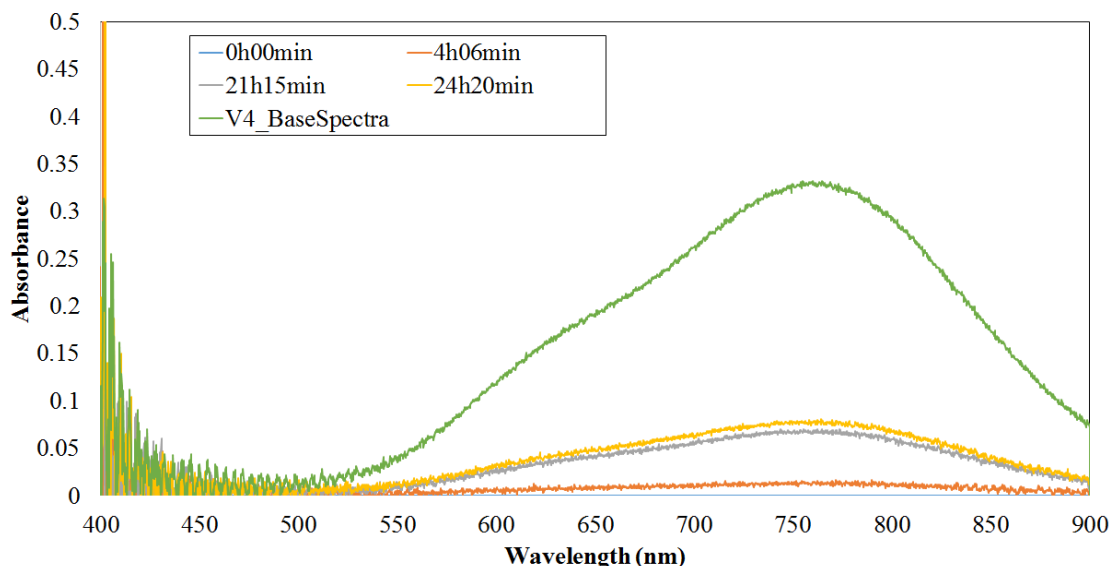

Figure S1. Calibration spectra for detection of the V(IV) ion via UV-Vis spectroscopy.

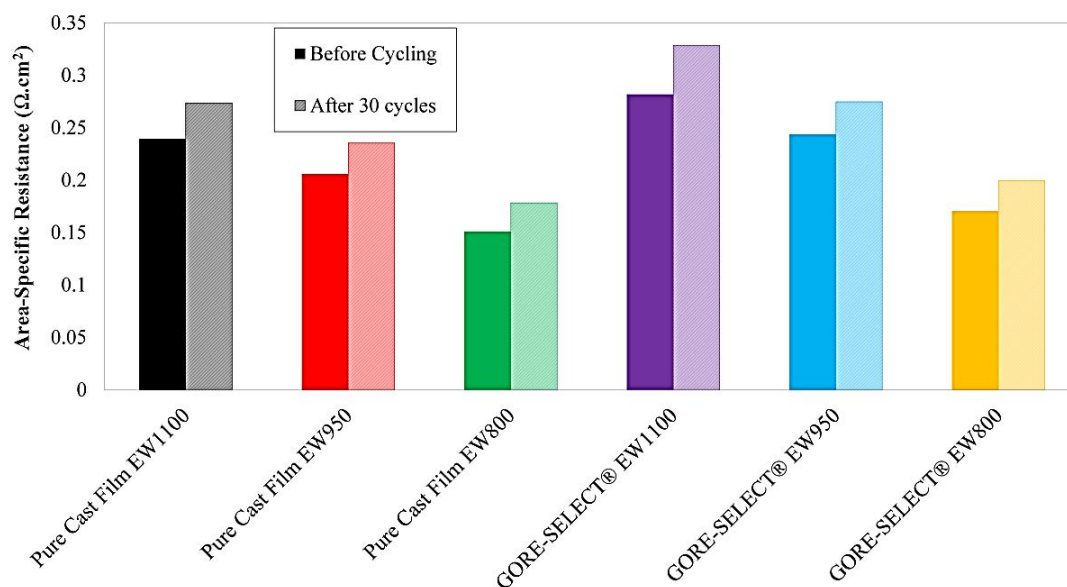

Figure S2. Area-specific resistance ( $\Omega \cdot \text{cm}^2$ ).

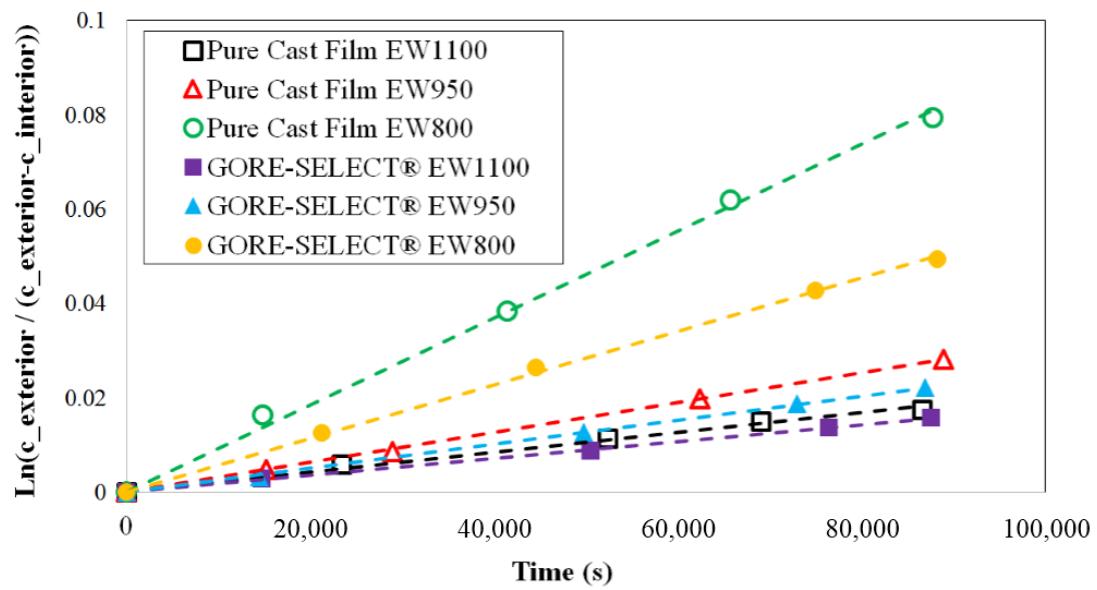

**Figure S3.** Semi-natural log plot used to determine permeability based on V(IV) ion diffused concentration.
